# Supplementary material for: A novel facile method using polyetheretherketone as a solid phase extraction material for fast quantification of urinary monohydroxylated metabolites of polycyclic aromatic hydrocarbons
Source: Royal Society of Chemistry journal article supplement (doi:10.1039/c4ra05114a), 2014-01-01
Supplement: c4ra05114a1.pdf [file c4ra05114a1.pdf]

## Supplementary Information

A novel facile method by using polyetheretherketone as a solid phase extraction material for fast quantification of urinary monohydroxylated metabolites of polycyclic aromatic hydrocarbons

Yinping Li,<sup>a</sup> Xue Li<sup>\*a,b</sup> and Zhen Zhou<sup>a,b</sup>

*<sup>a</sup> Institute of Environmental Pollution and Health, School of Environmental and Chemical Engineering, Shanghai University, Shanghai 200444, China*

*<sup>b</sup> Institute of Atmospheric Environmental Safety and Pollution Control, Jinan University, Guangzhou 510632, China*

\* To whom correspondence is addressed.

Dr. Xue Li

E-mail: [zlpamylee@gmail.com](mailto:zlpamylee@gmail.com)

Tel: +86-20-85221076

Fax: +86-20-85225991

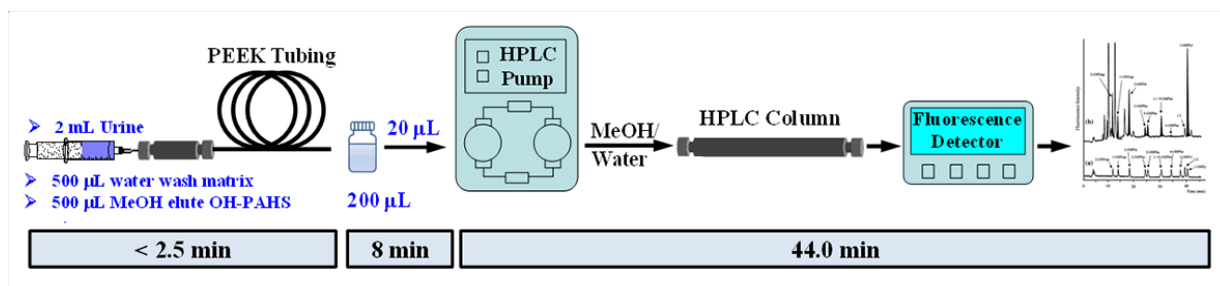

**Fig. S1** Schematic diagram of the system that uses PEEK tubing for offline SPE coupled to HPLC-FD for the analysis of urinary OH-PAHs.

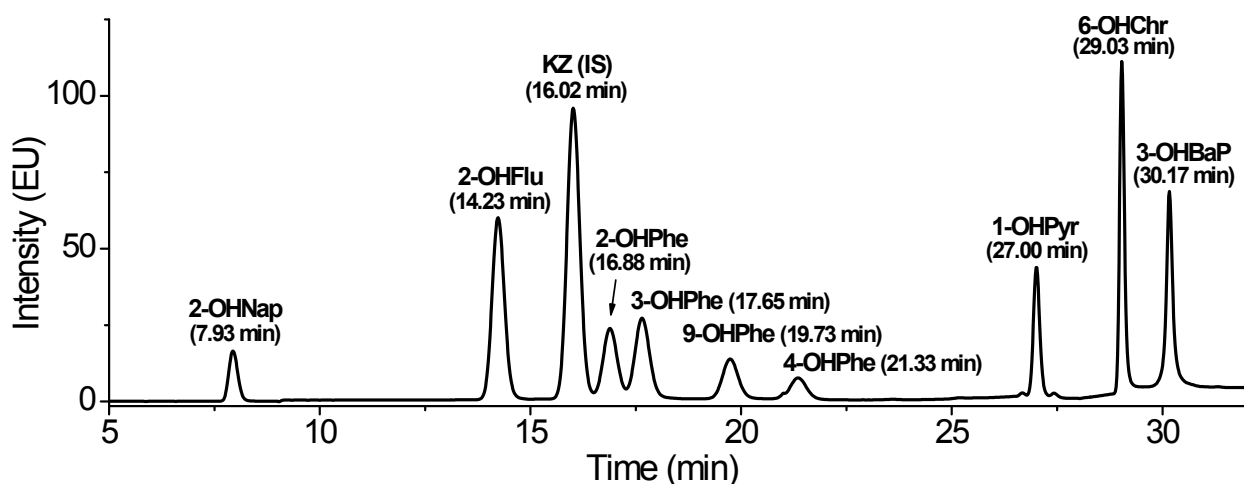

**Fig. S2** HPLC chromatogram of the mixed standard solution containing  $10 \mu\text{g L}^{-1}$  of OH-PAHs and  $34 \mu\text{g L}^{-1}$  of KZ (IS).

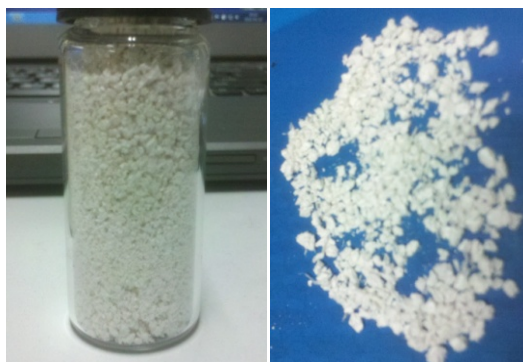

**Fig. S3** The commercial product of PEEK particle with an average diameter of  $500 \mu\text{m}$ .

**Table S1** Switching process for changing excitation and emission wavelengths (Ex/Em) to detect nine OH-PAHs and KZ (IS).

| OH-PAHs        | Time (min) | Ex (nm) | Em (nm) |
|----------------|------------|---------|---------|
| 2-OHNap        | 0.0–9.0    | 227     | 355     |
| 2-OHFlu        | 9.0–15.0   | 275     | 330     |
| KZ, 2-/3-OHPhe | 15.0–19.0  | 250     | 360     |
| 9-OHPhe        | 19.0–21.0  | 252     | 386     |
| 4-OHPhe        | 21.0–26.5  | 265     | 351     |
| 1-OHPyr        | 26.5–28.0  | 242     | 396     |
| 6-OHChr        | 28.0–29.5  | 262     | 375     |
| 3-OHBaP        | 29.5–44.0  | 368     | 428     |

**Table S2** Limit of quantification (LOQ), and time and sample volume used for sample pretreatment when PEEK (this study) and C<sub>18</sub> (references) are used as a SPE material, respectively.<sup>a</sup>

| SPE material              | Sources       | OH-PAHs | LOQ (µg L <sup>-1</sup> ) | Time (min) | Sample volume (mL) |
|---------------------------|---------------|---------|---------------------------|------------|--------------------|
| PEEK (Offline)            | This study    | 1-OHP   | 0.6                       | < 2.5      | 2                  |
|                           |               | 3-OHBaP | 0.6                       |            |                    |
| C <sub>18</sub> (Offline) | Reference [1] | 1-OHP   | 0.11                      | ~ 30       | 10–15              |
|                           |               | 3-OHBaP | 1.01                      |            |                    |
| C <sub>18</sub> (Online)  | Reference [2] | 1-OHP   | 0.20                      | 0.5        | 1                  |

<sup>a</sup> HPLC-FD is used in all these methods.

**Table S3** RSDs of four measurements of spiked hydrolyzed urine samples containing 0.6–50.0  $\mu\text{gL}^{-1}$  of OH-PAHs.

| OH-PAH  | 0.6 $\mu\text{gL}^{-1}$ | 1.0 $\mu\text{gL}^{-1}$ | 2.0 $\mu\text{gL}^{-1}$ | 5.0 $\mu\text{gL}^{-1}$ | 10.0 $\mu\text{gL}^{-1}$ | 50.0 $\mu\text{gL}^{-1}$ |
|---------|-------------------------|-------------------------|-------------------------|-------------------------|--------------------------|--------------------------|
| 2-OHNap | n.a. <sup>a</sup>       | n.a.                    | n.a.                    | 14.1                    | 17.2                     | 4.7                      |
| 2-OHFlu | n.a.                    | n.a.                    | n.a.                    | 8.3                     | 11.7                     | 5.7                      |
| 2-OHPhe | 31.1                    | 24.5                    | 7.6                     | 2.9                     | 4.9                      | 5.5                      |
| 3-OHPhe | 42.6                    | 43.1                    | 20.3                    | 3.7                     | 4.8                      | 5.3                      |
| 4-OHPhe | 51.0                    | 45.7                    | 15.4                    | 12.5                    | 14.4                     | 15.3                     |
| 9-OHPhe | n.a.                    | n.a.                    | 44.2                    | 5.6                     | 9.6                      | 11.0                     |
| 1-OHPyr | 21.2                    | 14.6                    | 4.0                     | 5.6                     | 5.8                      | 3.4                      |
| 6-OHChr | 33.1                    | 27.8                    | 3.3                     | 6.6                     | 11.8                     | 5.2                      |
| 3-OHBaP | 7.9                     | 9.3                     | 9.0                     | 13.8                    | 12.3                     | 16.3                     |

<sup>a</sup> not available.

**Table S4** Values of slope and adjusted  $R^2$  (Adj.  $R^2$ ) of linear regressions of the plots for inner diameter and length effects.

| OH-PAHs | Slope (Adj. $R^2$ ) |                |
|---------|---------------------|----------------|
|         | ID effects          | Length effects |
| 2-OHPhe | 0.0065 (0.995)      | 0.0019 (0.966) |
| 3-OHPhe | 0.0065 (0.994)      | 0.0019 (0.943) |
| 4-OHPhe | 0.0065 (0.994)      | 0.0018 (0.992) |
| 9-OHPhe | 0.0065 (0.985)      | 0.0018 (0.848) |
| 1-OHPyr | 0.0066 (0.990)      | 0.0020 (0.994) |
| 6-OHChr | 0.0065 (0.998)      | 0.0020 (0.972) |
| 3-OHBaP | 0.0062 (0.952)      | 0.0019 (0.906) |

**Table S5** Occurrence of urinary OH-PAHs in occupationally exposed workers.

| OH-PAHs        | Concentration ( $\mu\text{g L}^{-1}$ ) | Exposure route                    | Ref |
|----------------|----------------------------------------|-----------------------------------|-----|
| 2-OHNap        | 36.4                                   | Coke-oven workers                 | [3] |
|                | 13.3                                   | Asphalt workers/smokers           | [4] |
|                | 16.8                                   | Road construction workers/smokers | [4] |
| OH-Flu         | 9.0                                    | Coke plant workers                | [5] |
| 2-OHPhe        | 15.7,                                  | Coke plant workers                | [5] |
| 3-OHPhe        | 5.7                                    | Coke-oven workers                 | [3] |
| 3- and 9-OHPhe | 19.2                                   | Coke plant workers                | [5] |
| 1-OHPyr        | 15.4                                   | Coke-oven workers                 | [3] |
|                | 7.6                                    | Coke plant workers                | [5] |
| 3-OHBaP        | 161.7                                  | Asphalt fume exposed              | [6] |

**Table S6** Recoveries (*R*) obtained for nine OH-PAHs when PEEK particle (average diameter 500  $\mu\text{m}$ ) and PEEK tubing (500  $\mu\text{m}$  ID) were used, respectively. <sup>a</sup>

| OH-PAHs | <i>R</i> (%)_Particle | <i>R</i> (%)_Tubing |
|---------|-----------------------|---------------------|
| 2-OHNap | 80.9                  | 0.3                 |
| 2-OHFlu | 88.2                  | 1.0                 |
| 2-OHPhe | 51.3                  | 4.3                 |
| 3-OHPhe | 54.8                  | 4.1                 |
| 4-OHPhe | 28.9                  | 4.6                 |
| 9-OHPhe | 51.4                  | 4.1                 |
| 1-OHPyr | 43.5                  | 14.4                |
| 6-OHChr | 34.2                  | 22.8                |
| 3-OHBaP | 22.2                  | 8.9                 |

<sup>a</sup> It is noteworthy that further work by using this PEEK particle has not been carried out, because it is an industrial product and the particle size is not evenly distributed (Fig. S3).

## References

- [1] F. J. Jongeneelen, R. B. M. Anzion and P. T. Henderson, *J. Chromatogr.*, 1987, **413**, 227.
- [2] X. Cahours, M. Blanchet and M. Rey, *J. Sep. Sci.*, 2009, **32**, 3403.
- [3] L. Campo, F. Rossella, S. Pavanello, D. Mielzynska, E. Siwinska, L. Kapka, P. A. Bertazzi and S. Fustinoni, *Toxicol. Lett.*, 2010, **192**, 72.
- [4] M. Buratti, L. Campo, S. Fustinoni, P. E. Cirila, I. Martinotti, D. Cavallo and V. Foa, *Biomarkers*, 2007, **12**, 221.
- [5] G. Grimmer, G. Dettbarn, K. W. Naujack and J. Jacob, *Int. J. Environ. Anal. Chem.*, 2006, **43**, 177.
- [6] J. J. Wang, D. G. Frazer, S. Stone, T. Goldsmith, B. Law, A. Moseley, J. Simpson, A. Afshari and D. M. Lewis, *Anal. Chem.*, 2003, **75**, 5953.
